# Supplementary material for: Targeting HIF-1α Regulatory Pathways as a Strategy to Hamper Tumor-Microenvironment Interactions in CLL
Source: MDPI journal article supplement (doi:10.3390/cancers13122883), 2021-06-09

# Targeting HIF-1 $\alpha$ Regulatory Pathways as a Strategy to Hamper Tumor-Microenvironment Interactions in CLL

Candida Vitale <sup>1,2,†</sup>, Valentina Griggio <sup>1,2,†</sup>, Chiara Riganti <sup>3</sup>, Maria Todaro <sup>1,2</sup>, Joanna Kopecka <sup>3</sup>, Rebecca Jones <sup>1,2</sup>, Chiara Salvetti <sup>1,2</sup>, Elia Boccellato <sup>1,2</sup>, Francesca Perutelli <sup>1,2</sup>, Claudia Voena <sup>2</sup>, Laura Godio <sup>4</sup>, Mario Boccadoro <sup>1,2</sup>  
and Marta Coscia <sup>1,2,\*</sup>

- <sup>1</sup> University Division of Hematology, A.O.U. Città della Salute e della Scienza di Torino, via Genova 3, 10126 Torino, Italy; candida.vitale@unito.it (C.V.); valentina.griggio@unito.it (V.G.); maria.todaro@unito.it (M.T.); rebecca.jones@unito.it (R.J.); chiara.salvetti@unito.it (C.S.); elia.boccellato@unito.it (E.B.); francesca.perutelli@unito.it (F.P.); mario.boccadoro@unito.it (M.B.)
- <sup>2</sup> Department of Molecular Biotechnology and Health Sciences, University of Torino, via Nizza 52, 10126 Torino, Italy; claudia.voena@unito.it
- <sup>3</sup> Department of Oncology, University of Torino, via Santena 5, 10126 Torino, Italy; chiara.riganti@unito.it (C.R.); joanna.kopecka@unito.it (J.K.)
- <sup>4</sup> Division of Pathology, A.O.U. Città della Salute e della Scienza di Torino, via Santena 5, 10126 Torino, Italy; lgodio@cittadellasalute.to.it
- \* Correspondence: marta.coscia@unito.it; Tel.: +39-0116336728; Fax: +39-0116963737
- † These authors contributed equally to this work.

**Table S1.** Summary of patients' characteristics

| Unique Patient Number (UPN) | Sex | IGHV | Del(17p) and/or <i>TP53</i> mutation | Therapy     |
|-----------------------------|-----|------|--------------------------------------|-------------|
| UPN01                       | m   | M    | N                                    | off-therapy |
| UPN02                       | f   | M    | Y                                    | off-therapy |
| UPN03                       | m   | UM   | Y                                    | off-therapy |
| UPN04                       | f   | UM   | Y                                    | off-therapy |
| UPN05                       | m   | UM   | N                                    | off-therapy |
| UPN07                       | f   | M/UM | N                                    | off-therapy |
| UPN08                       | f   | M    | N*                                   | off-therapy |
| UPN09                       | m   | UM   | N                                    | off-therapy |
| UPN10                       | f   | UM   | Y                                    | off-therapy |
| UPN12                       | m   | M    | N                                    | off-therapy |
| UPN13                       | m   | M    | N*                                   | off-therapy |
| UPN14                       | m   | UM   | Y                                    | off-therapy |
| UPN15                       | m   | UM   | N                                    | off-therapy |
| UPN16                       | m   | UM   | N                                    | off-therapy |
| UPN17                       | m   | UM   | N                                    | off-therapy |
| UPN18                       | m   | M    | Y                                    | off-therapy |
| UPN19                       | m   | M    | N                                    | off-therapy |
| UPN20                       | m   | M    | N*                                   | off-therapy |
| UPN21                       | m   | UM   | N                                    | off-therapy |
| UPN22                       | f   | na   | Y                                    | off-therapy |
| UPN23                       | m   | UM   | N                                    | off-therapy |
| UPN24                       | m   | na   | N                                    | off-therapy |
| UPN25                       | m   | UM   | N                                    | off-therapy |
| UPN26                       | m   | M    | Y                                    | off-therapy |
| UPN27                       | m   | UM   | N*                                   | off-therapy |
| UPN28                       | f   | M    | Y                                    | off-therapy |
| UPN29                       | m   | UM   | N                                    | off-therapy |
| UPN30                       | m   | UM   | N                                    | off-therapy |
| UPN31                       | m   | UM   | N                                    | off-therapy |
| UPN32                       | m   | UM   | Y                                    | off-therapy |
| UPN33                       | f   | na   | na                                   | off-therapy |
| UPN34                       | m   | M    | N                                    | off-therapy |
| UPN35                       | m   | na   | Y                                    | off-therapy |
| UPN36                       | m   | UM   | N                                    | off-therapy |
| UPN37                       | m   | UM   | N                                    | off-therapy |
| UPN38                       | m   | UM   | N                                    | off-therapy |
| UPN39                       | f   | M    | N                                    | off-therapy |
| UPN40                       | m   | M    | N                                    | off-therapy |
| UPN41                       | m   | UM   | N                                    | off-therapy |
| UPN42                       | f   | UM   | N                                    | off-therapy |
| UPN43                       | f   | na   | Y                                    | off-therapy |
| UPN44                       | m   | M    | N*                                   | off-therapy |

|       |   |    |    |             |
|-------|---|----|----|-------------|
| UPN45 | m | UM | N  | off-therapy |
| UPN46 | m | UM | Y  | off-therapy |
| UPN47 | m | na | na | off-therapy |
| UPN48 | f | M  | N  | off-therapy |
| UPN49 | m | M  | N  | off-therapy |
| UPN50 | m | UM | N  | off-therapy |
| UPN51 | f | UM | Y  | off-therapy |
| UPN52 | m | UM | Y  | off-therapy |
| UPN53 | f | UM | N  | off-therapy |
| UPN54 | f | UM | N  | off-therapy |
| UPN55 | f | na | Y  | off-therapy |
| UPN56 | m | M  | Y  | off-therapy |
| UPN57 | f | M  | Y  | off-therapy |
| UPN58 | m | na | Y  | off-therapy |
| UPN59 | m | UM | N  | off-therapy |
| UPN60 | f | M  | N  | off-therapy |
| UPN61 | f | UM | N  | off-therapy |
| UPN62 | m | M  | N  | off-therapy |
| UPN63 | m | na | na | off-therapy |
| UPN64 | m | na | N  | off-therapy |
| UPN65 | f | UM | Y  | off-therapy |
| UPN66 | m | M  | N  | off-therapy |
| UPN67 | f | M  | N  | off-therapy |
| UPN68 | m | M  | Y  | off-therapy |
| UPN69 | m | UM | N  | off-therapy |
| UPN71 | m | UM | N  | off-therapy |
| UPN72 | m | UM | Y  | off-therapy |
| UPN73 | f | na | na | off-therapy |
| UPN74 | m | na | Y  | off-therapy |
| UPN75 | m | UM | Y  | off-therapy |
| UPN77 | m | na | N  | off-therapy |
| UPN78 | f | UM | N  | off-therapy |
| UPN79 | m | M  | N  | off-therapy |
| UPN80 | f | UM | N  | off-therapy |
| UPN81 | m | na | na | off-therapy |
| UPN82 | m | UM | N* | off-therapy |
| UPN83 | m | UM | N  | off-therapy |
| UPN84 | m | M  | N  | off-therapy |
| UPN85 | f | UM | N  | off-therapy |
| UPN87 | f | na | N* | off-therapy |
| UPN88 | f | UM | N  | off-therapy |
| UPN89 | m | na | N  | off-therapy |
| UPN90 | m | M  | N  | off-therapy |
| UPN91 | m | na | na | off-therapy |
| UPN92 | m | UM | N  | off-therapy |
| UPN93 | m | na | na | off-therapy |
| UPN94 | m | M  | N  | off-therapy |

|        |   |    |    |             |
|--------|---|----|----|-------------|
| UPN95  | m | na | N* | off-therapy |
| UPN96  | f | UM | N  | off-therapy |
| UPN97  | m | UM | Y  | off-therapy |
| UPN98  | m | na | na | off-therapy |
| UPN99  | m | M  | N  | off-therapy |
| UPN100 | m | M  | N* | off-therapy |
| UPN101 | f | M  | N  | off-therapy |
| UPN102 | m | UM | N  | off-therapy |
| UPN103 | m | na | N* | off-therapy |
| UPN104 | f | M  | N* | off-therapy |
| UPN105 | f | UM | N  | off-therapy |
| UPN06  | m | UM | N  | idelalisib  |
| UPN11  | f | M  | N  | idelalisib  |
| UPN70  | f | M  | N  | idelalisib  |
| UPN76  | f | UM | Y  | idelalisib  |
| UPN86  | m | UM | Y  | idelalisib  |

Abbreviations: UPN, unique patient number; m, male; f, female; IGHV, immunoglobulin heavy chain variable region; M, mutated; UM, unmutated; na, not available; \* Del(17p) is not present as assessed by fluorescence in situ hybridization, data on *TP53* mutation is not available.

Figure S1

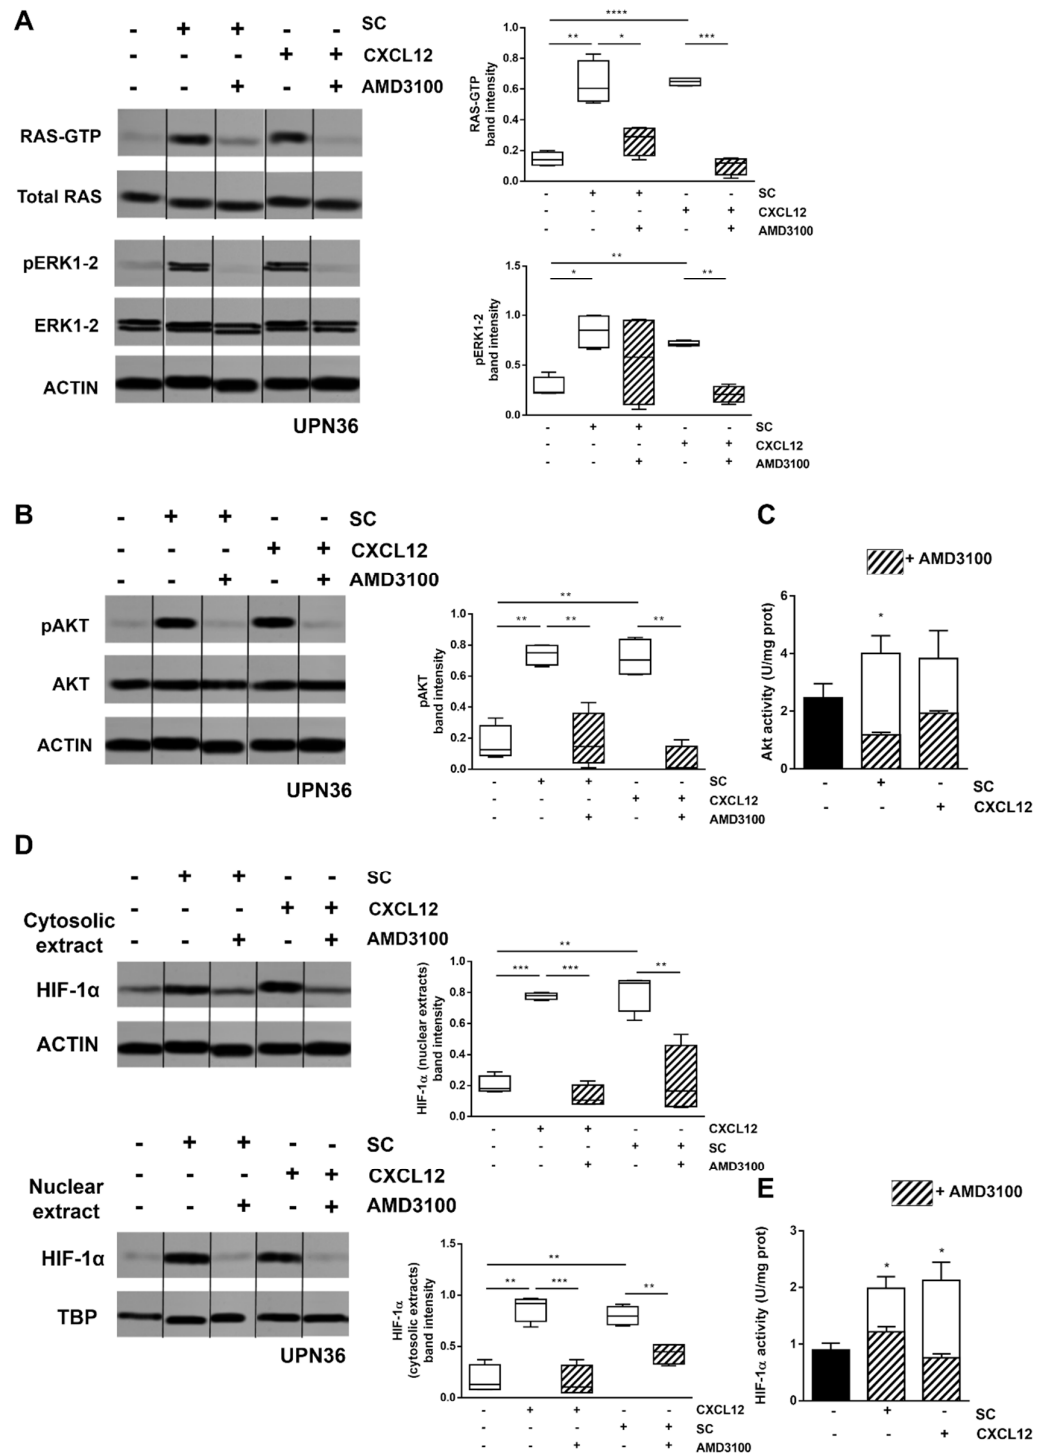

**Figure S1.** The CXCL12/CXCR4 axis plays a central role in the SC-mediated triggering of HIF-1 $\alpha$  regulatory pathways. Primary CLL cells were cultured for 6 hours in presence of M2-10B4 SC or CXCL12. In selected conditions, the CXCR4 antagonist AMD3100 was added. Both SC and CXCL12 induced an increase in the amount of GTP-bound RAS (RAS-GTP) and of the active phosphorylated form of ERK1-2 (pERK1-2) (**A**), and in the phosphorylation and activity of AKT (**B,C**). Accordingly, CLL cells cultured with SC or CXCL12 displayed an increase in the cytosolic and nuclear amount of HIF-1 $\alpha$  (**D**), and in HIF-1 $\alpha$  activity (**E**). The addition of the CXCR4 antagonist AMD3100 abrogated the inducing effects mediated both by SC and CXCL12 at all levels, except for pERK1-2 when CLL cells were exposed to SC. In (**A,B,D**) a representative blot (with relative Unique Patient Number, UPN) together with the corresponding cumulative band intensity data of 4 independent experiments is shown. Box and whiskers plots represent median values, 25%-75% percentiles, and minimum and maximum values for each group. In (**C,E**) bar graphs represent mean results and SEM ( $n = 4$ ). Vertical lines have been inserted to indicate repositioned gel lanes. \*\*\*\*  $p < 0.0001$ , \*\*\*  $p < 0.001$ , \*\*  $p < 0.01$  and \*  $p < 0.05$ . Please find the whole western blot in the supplementary file 1.

**Figure S2**

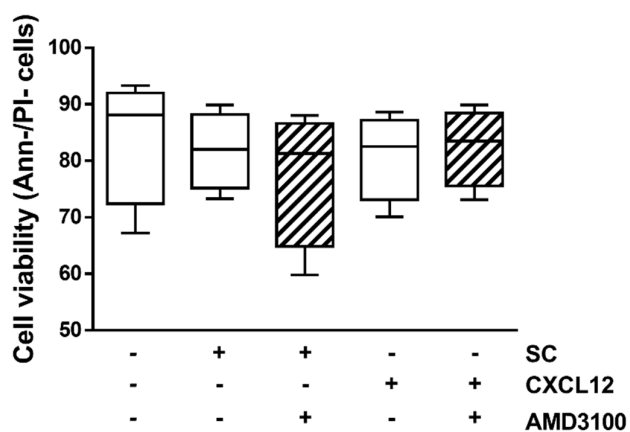

**Figure S2.** The exposure of CLL cells to AMD3100 does not reduce tumor cell viability. Primary CLL cells were cultured for 6 hours in presence of M2-10B4 SC or CXCL12. In selected conditions, the CXCR4 antagonist AMD3100 was added. There is no significant difference in the viability of CLL cells cultured in different conditions. Box and whiskers plots represent median values, 25%-75% percentiles, and minimum and maximum values for each group ( $n = 4$ ).

**Figure S3**



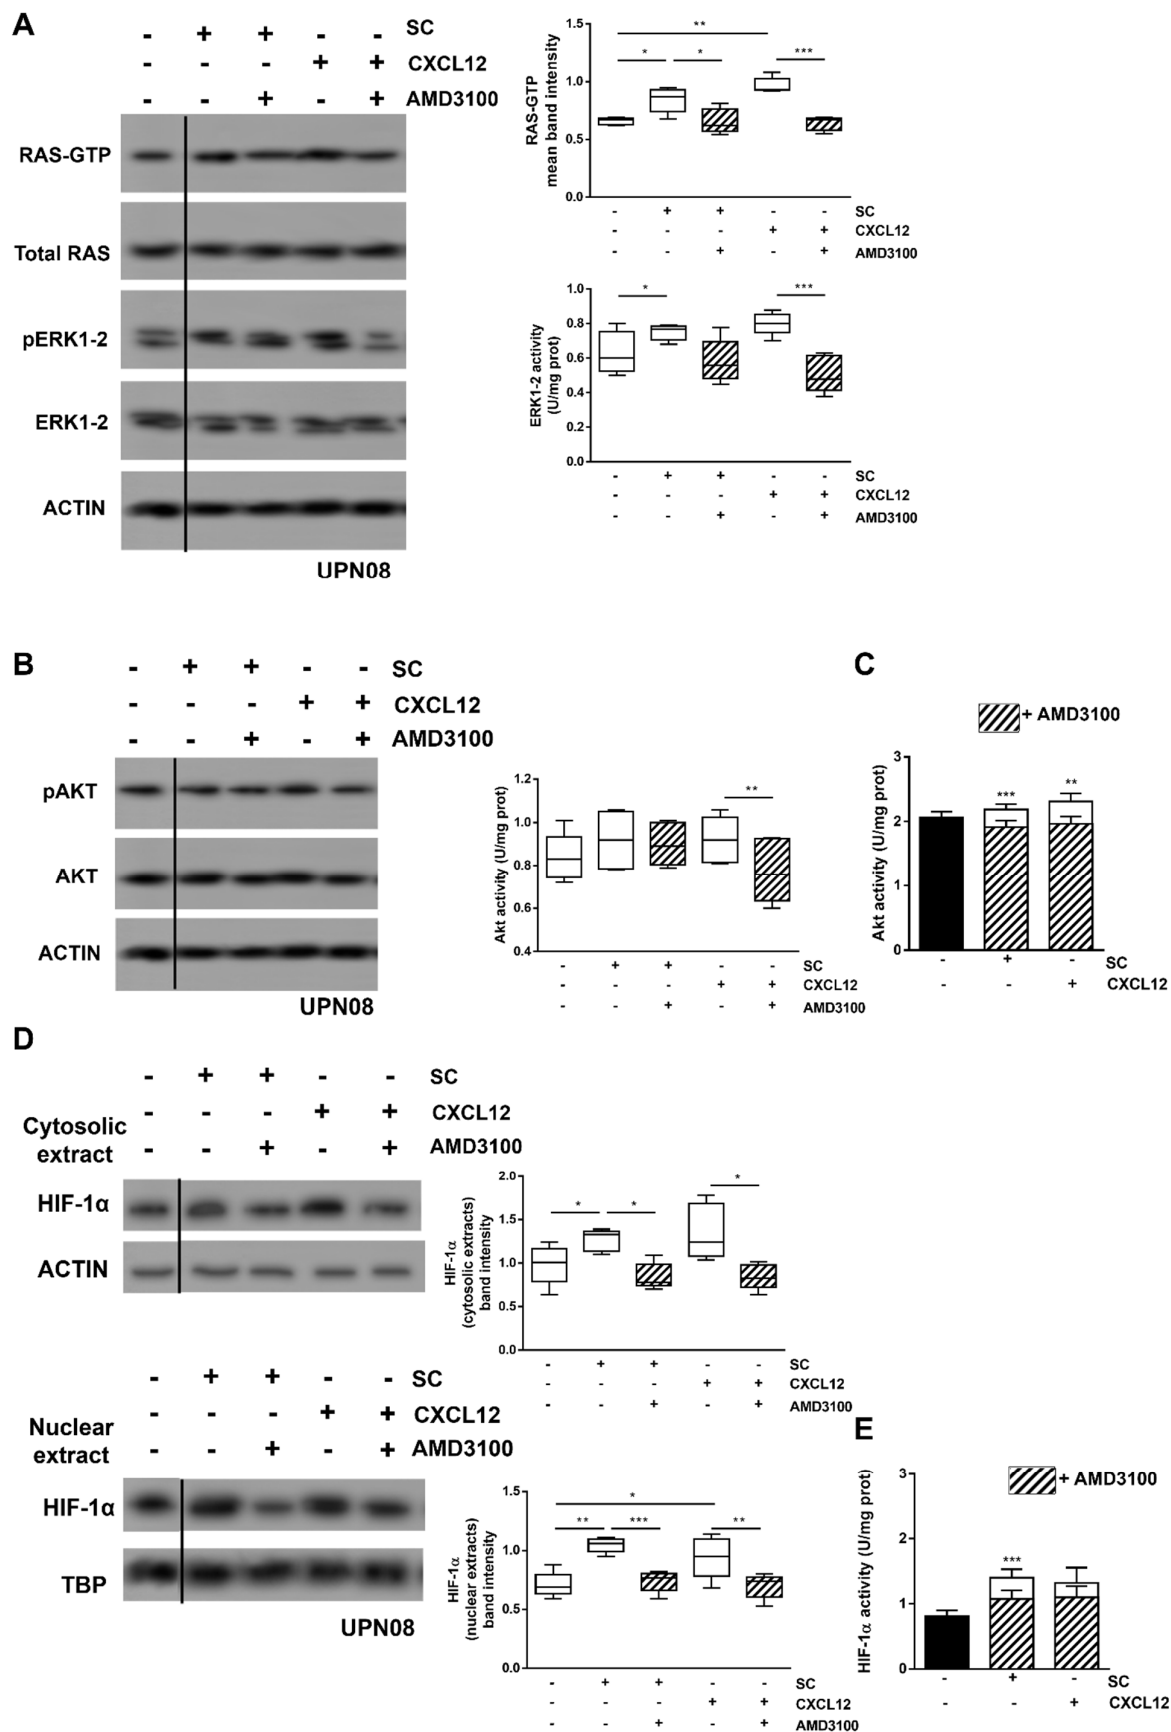

**Figure S3.** The CXCL12/CXCR4 axis plays a central role in the SC-mediated triggering of HIF-1 $\alpha$  regulatory pathways. Primary CLL cells were cultured for 30 minutes in presence of M2-10B4 SC or CXCL12. In selected conditions, the CXCR4 antagonist AMD3100 was added. Both SC and CXCL12 induced an increase in the amount of GTP-bound RAS (RAS-GTP) and of the active phosphorylated form of ERK1-2 (pERK1-2) (**A**). By contrast, the phosphorylation and activity of AKT was not significantly modulated by the microenvironmental stimuli, at this early timepoint (**B-C**). CLL cells cultured with SC or CXCL12 displayed an increase in the cytosolic and nuclear amount of HIF-1 $\alpha$  (**D**), and in HIF-1 $\alpha$  activity (**E**). The addition of the CXCR4 antagonist AMD3100 abrogated the upregulation induced by SC and CXCL12 on RAS, ERK1-2 and HIF-1 $\alpha$ . In (**A,B,D**) a representative blot (with relative Unique Patient Number, UPN) together with the corresponding cumulative band intensity data of 5 independent experiments is shown. Box and whiskers plots represent median values, 25%-75% percentiles, and minimum and maximum values for each group. In (**C,E**) bar graphs represent mean results and SEM ( $n = 5$ ). Vertical lines have been inserted to indicate repositioned gel lanes. \*\*\*\*  $p < 0.0001$ , \*\*\*  $p < 0.001$ , \*\*  $p < 0.01$  and \* $p < 0.05$ . Please find the whole western blot in the supplementary file 1.

Figure S4

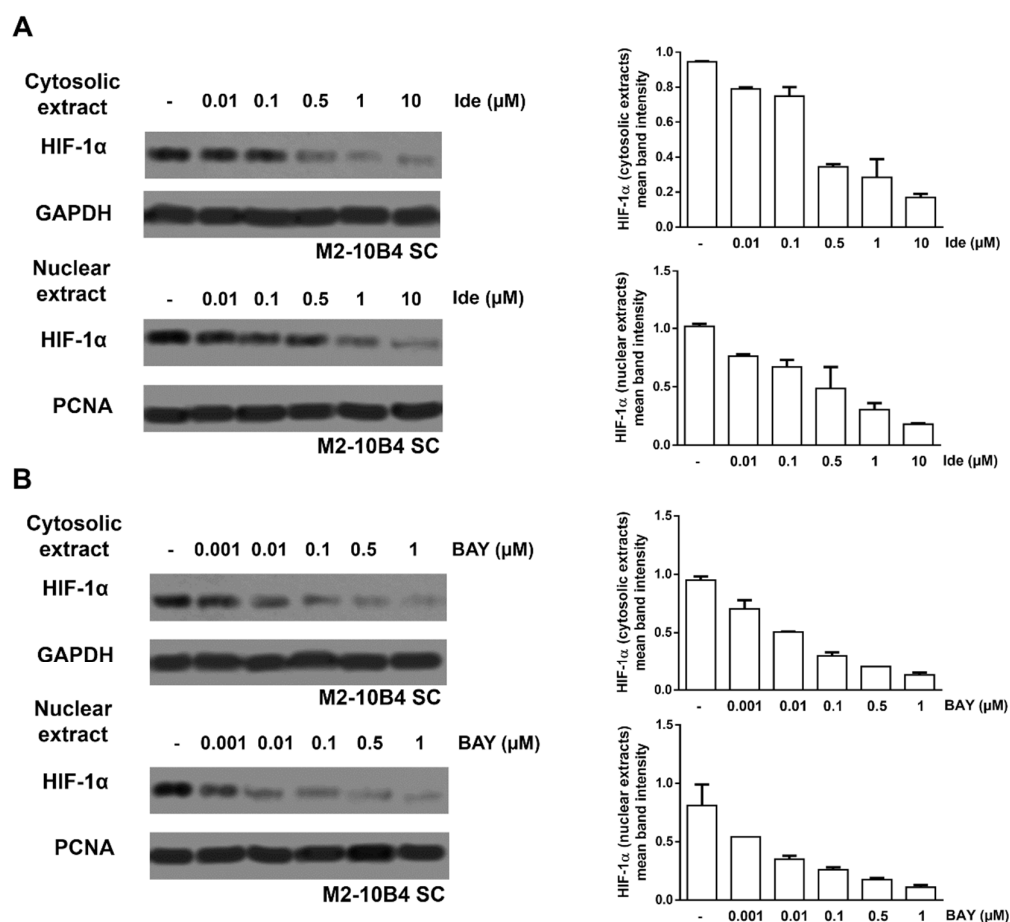

Supplement: s1 [file s1]
