# Supplementary material for: Targeting HIF-1α Regulatory Pathways as a Strategy to Hamper Tumor-Microenvironment Interactions in CLL
Source: MDPI journal article supplement (doi:10.3390/cancers13122883), 2021-06-09
Supplement: s1 [file s1]

# Western blots

Figure 1, Panel A

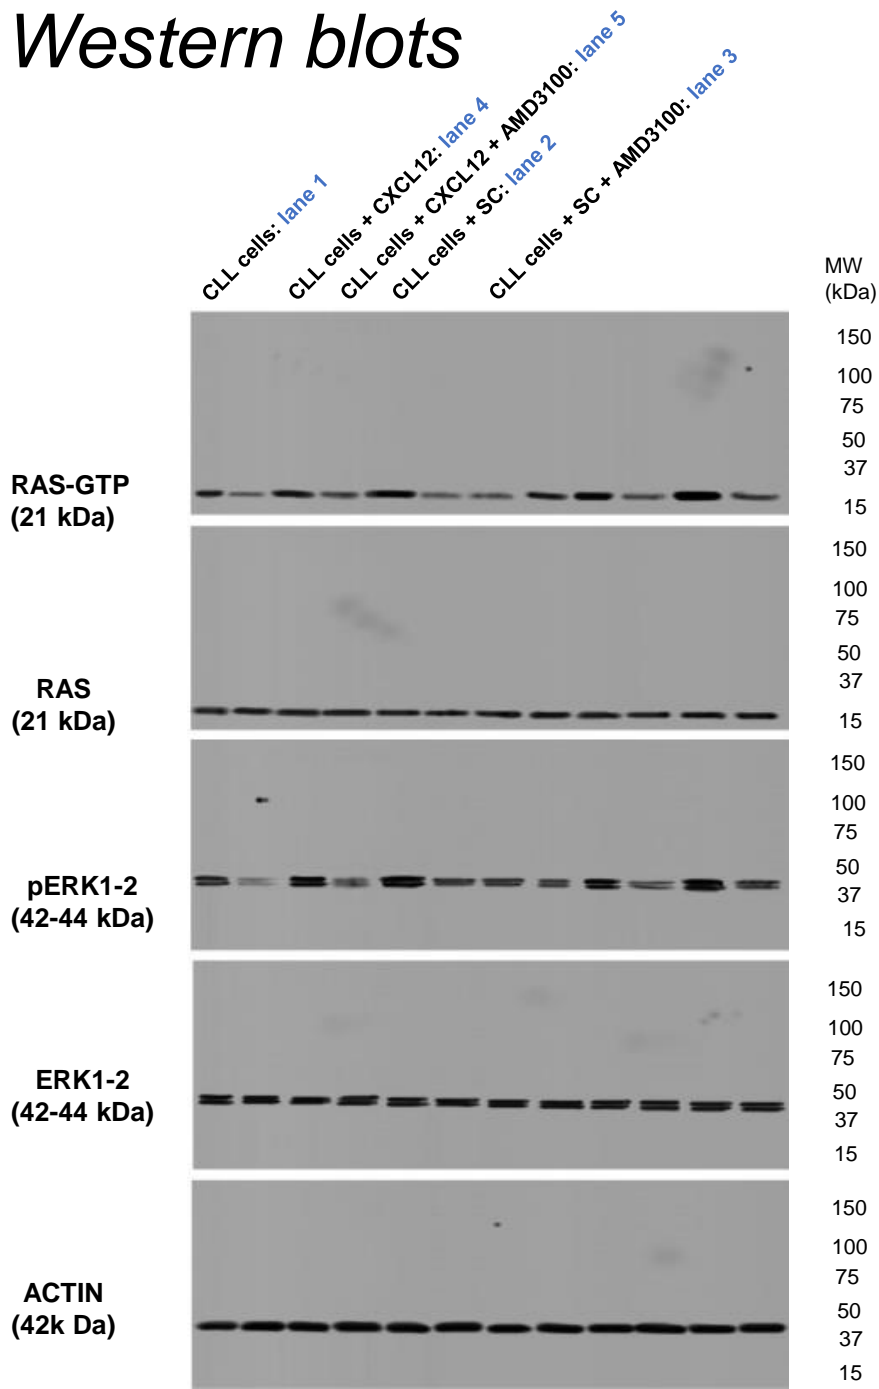

Densitometry reading

| UPN15   | -      | SC     | SC + AMD3100 | CXCL12 | CXCL12 + AMD3100 |
|---------|--------|--------|--------------|--------|------------------|
| RAS-GTP | 85,42  | 140,19 | 61,45        | 116,59 | 74,58            |
| pERK1-2 | 100,89 | 145,92 | 84,76        | 135,19 | 84,76            |
| ACTIN   | 115,05 | 126,19 | 117,45       | 134,12 | 134,9            |

The lanes of the whole blot used for each figure are indicated

# Western blots

Figure 1, Panel B

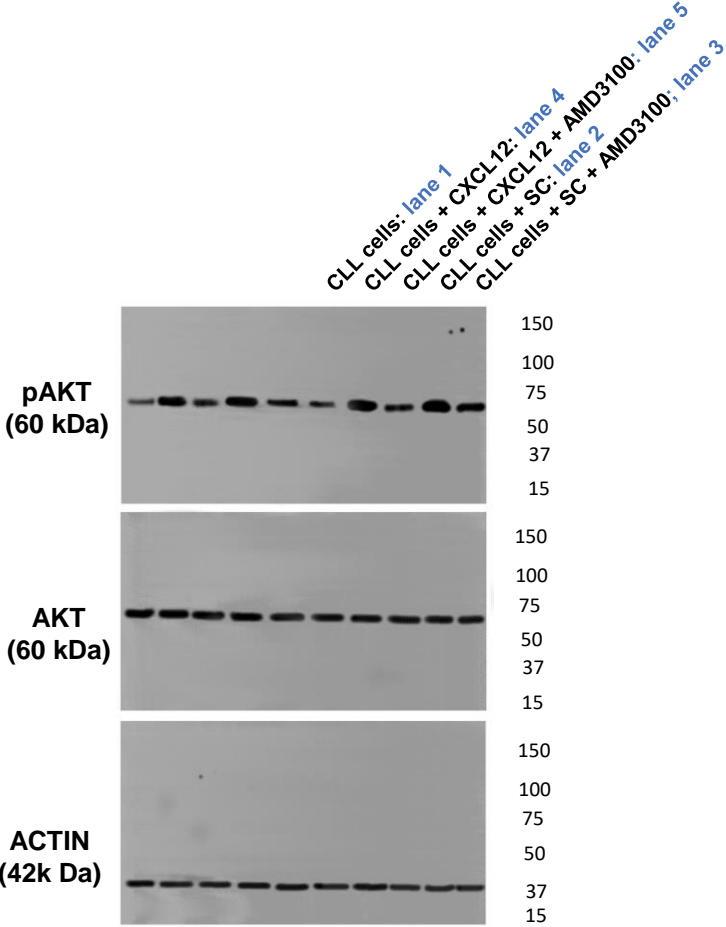

Densitometry reading

| UPN15 | -     | SC     | SC +<br>AMD3100 | CXCL12 | CXCL12 +<br>AMD3100 |
|-------|-------|--------|-----------------|--------|---------------------|
| pAKT  | 99,47 | 157,11 | 129,70          | 148,78 | 102,78              |
| ACTIN | 99,12 | 96,77  | 93,36           | 114,46 | 89,67               |

The lanes of the whole blot used for each figure are indicated

# Western blots

Figure 1, Panel D

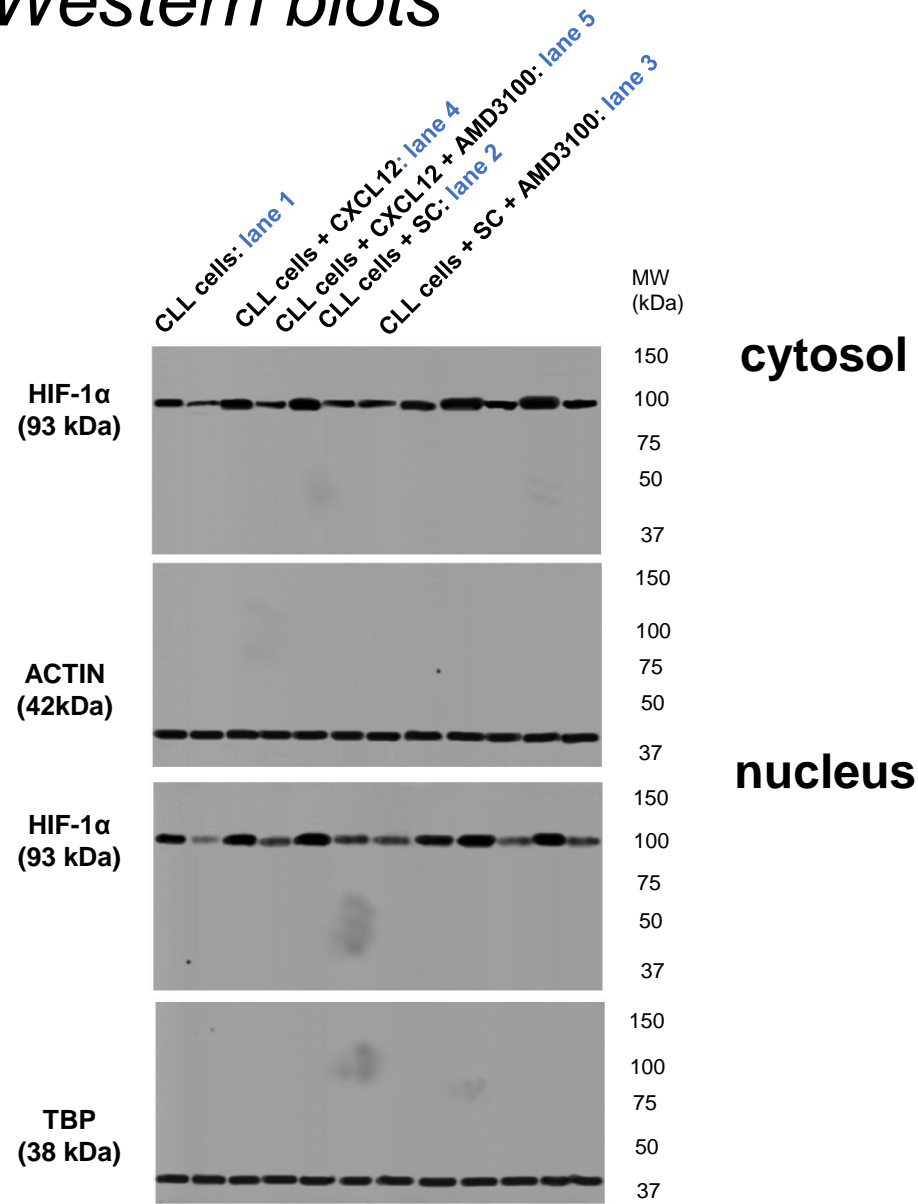

Densitometry reading

| UPN15      | -      | SC     | SC + AMD3100 | CXCL12 | CXCL12 + AMD3100 |
|------------|--------|--------|--------------|--------|------------------|
| HIF-1a (C) | 104,45 | 150,06 | 97,10        | 138,07 | 85,18            |
| ACTIN      | 117,34 | 117,19 | 120,29       | 114,44 | 115,38           |
| HIF-1a (N) | 114,10 | 148,90 | 82,6         | 138,2  | 79               |
| TBP        | 106,68 | 109,20 | 113,53       | 107,38 | 111,39           |

The lanes of the whole blot used for each figure are indicated

# Western blots

Figure 2B

Figure 2C

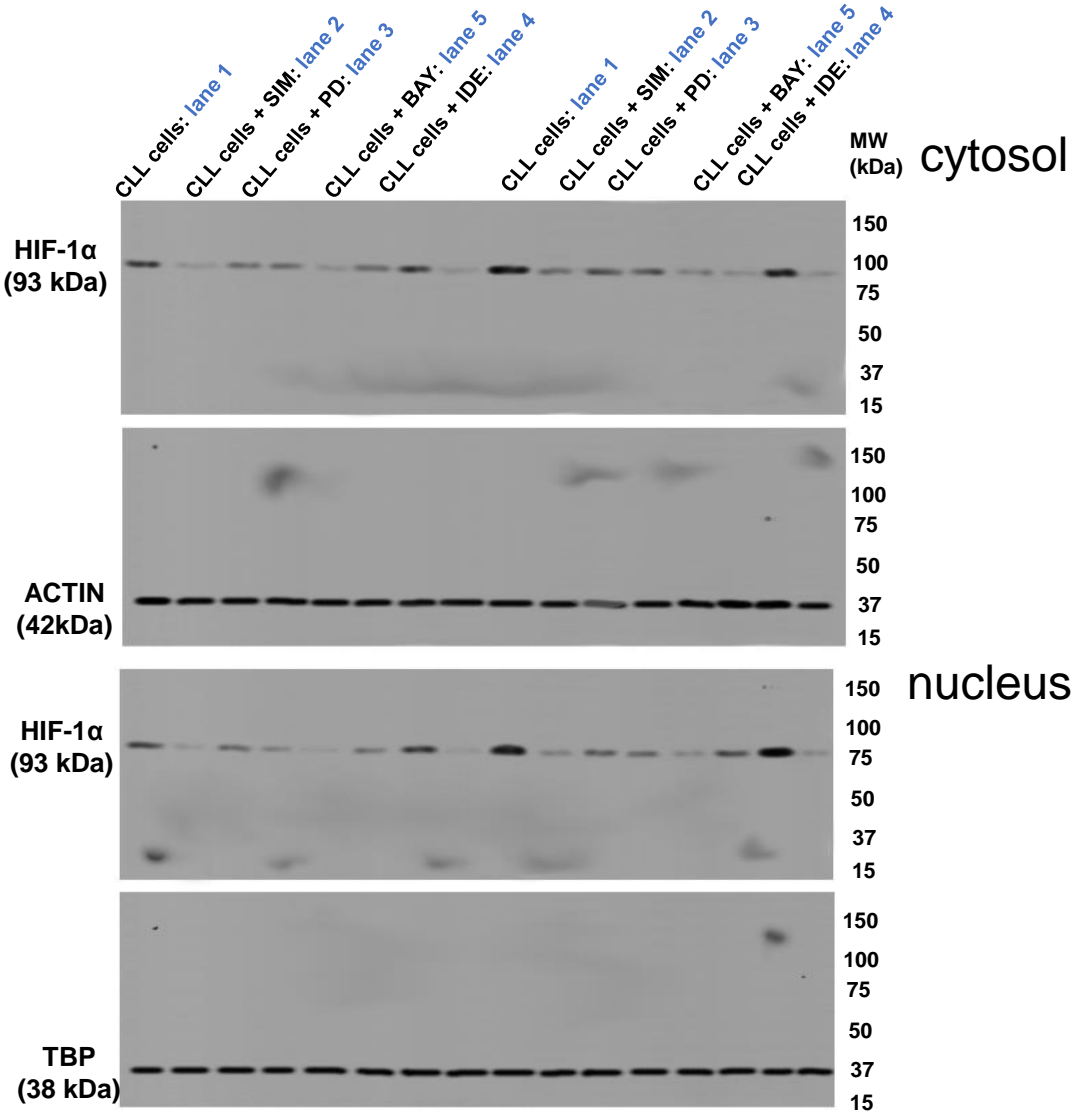

Figure 2, Panels B, C

Densitometry reading

| UPN79      | -      | SIM    | PD     | IDE    | BAY    |
|------------|--------|--------|--------|--------|--------|
| HIF-1a (C) | 56,62  | 8,94   | 28,4   | 33     | 12,18  |
| ACTIN      | 119,21 | 104,71 | 105,64 | 118,10 | 118,21 |
| HIF-1a (N) | 53,09  | 6,45   | 31,07  | 24,51  | 7,75   |
| TBP        | 112,60 | 121,41 | 121,99 | 121,63 | 121,76 |

Densitometry reading

| UPN79      | SC     | SC + SIM | SC + PD | SC + IDE | SC + BAY |
|------------|--------|----------|---------|----------|----------|
| HIF-1a (C) | 101,97 | 32,52    | 53,40   | 16,56    | 23,41    |
| ACTIN      | 120,06 | 113,54   | 113,79  | 134,07   | 120,58   |
| HIF-1a (N) | 100,21 | 20       | 38,71   | 47,78    | 17,66    |
| TBP        | 122,68 | 119,41   | 126,80  | 120,39   | 120,78   |

The lanes of the whole blot used for each figure are indicated

Western blots

Figure 2, Panel D

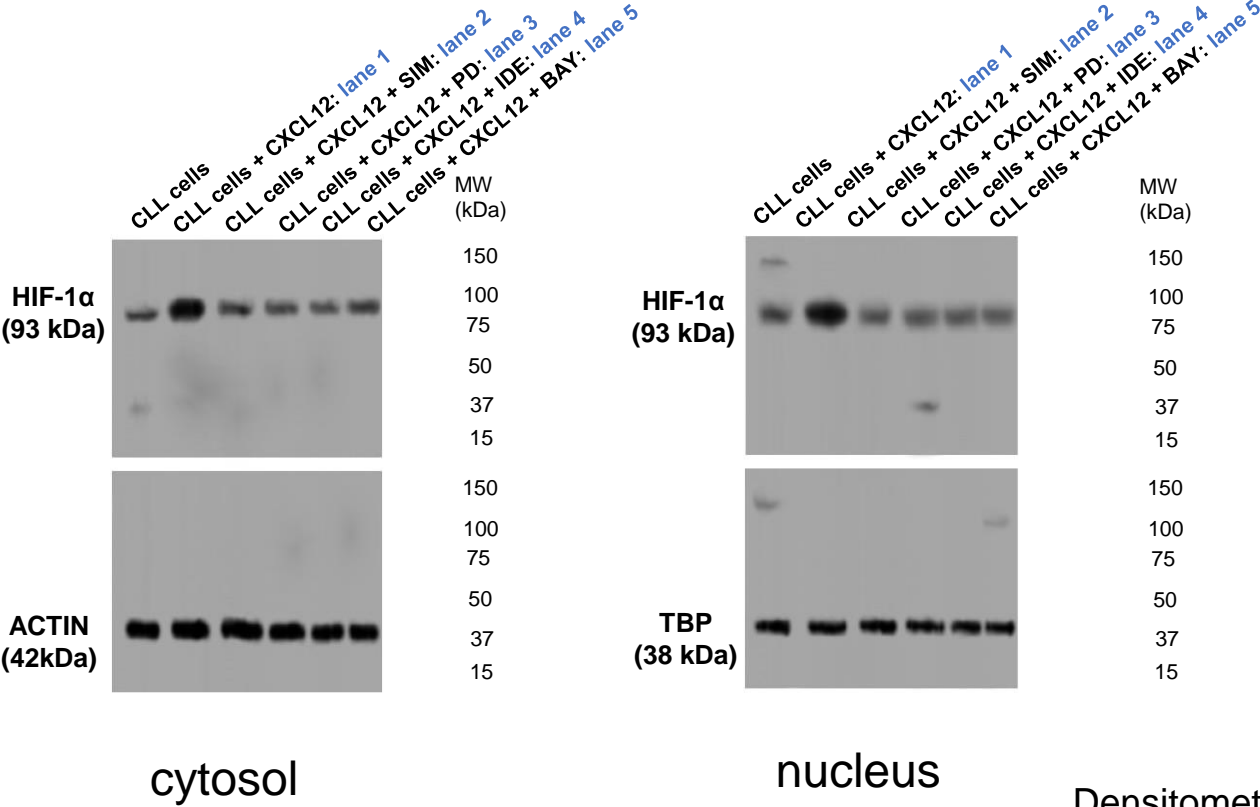

Densitometry reading

| UPN05      | -      | CXCL12 | CXCL12 + SIM | CXCL12 + PD | CXCL12 + IDE | CXCL12 + BAY |
|------------|--------|--------|--------------|-------------|--------------|--------------|
| HIF-1a (C) | 52,30  | 129,31 | 65,05        | 55,24       | 44,88        | 62,60        |
| ACTIN      | 133,83 | 131,88 | 141,20       | 137,47      | 136,22       | 134,88       |
| HIF-1a (N) | 64,01  | 131,86 | 56,88        | 59,48       | 57,34        | 52,27        |
| TBP        | 133,10 | 129,13 | 131,73       | 118,32      | 118,34       | 129,63       |

The lanes of the whole blot used for each figure are indicated

# Western blots

Figure 4, Panels A,B

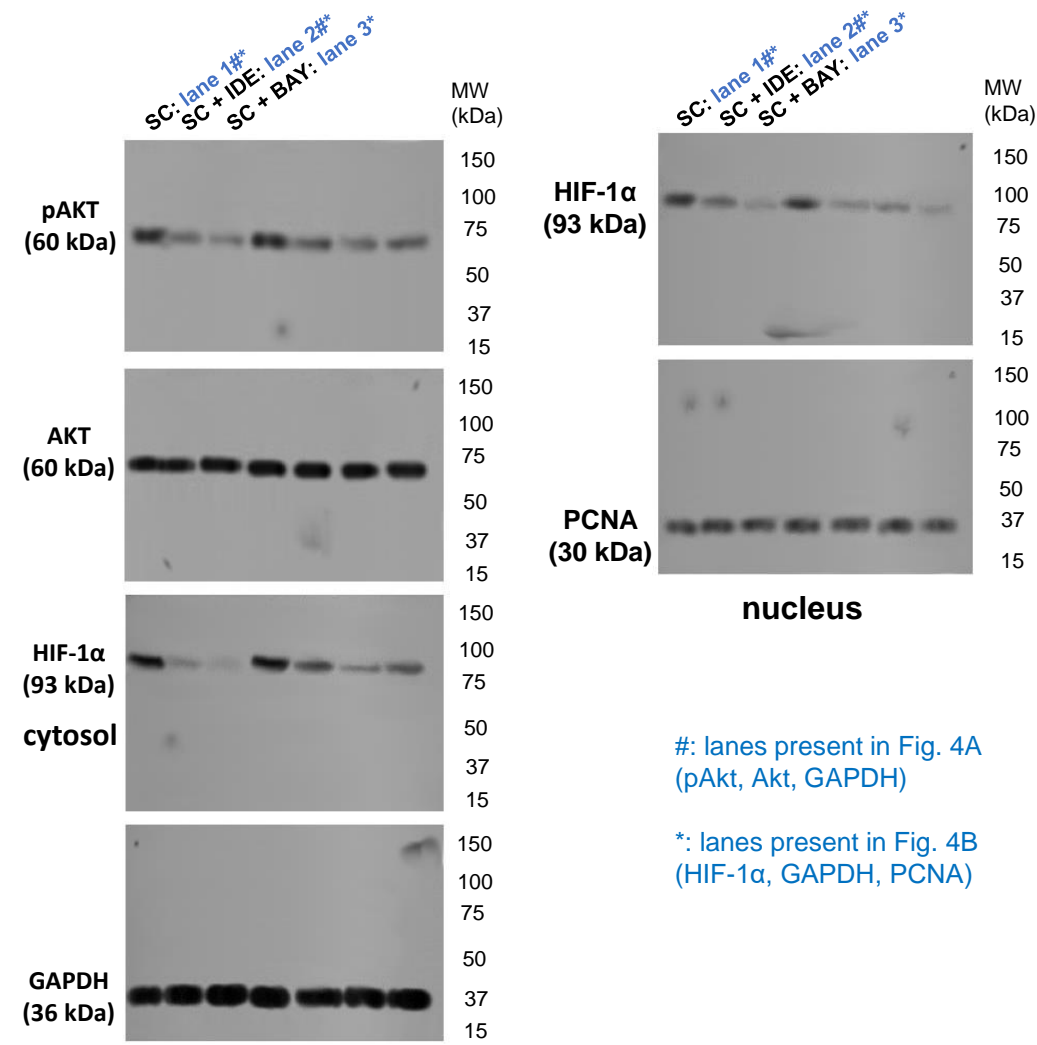

Densitometry reading

| M2-10B4    | SC     | SC + IDE | SC + BAY |
|------------|--------|----------|----------|
| pAKT       | 83,77  | 40,11    | /        |
| HIF-1a (C) | 70,86  | 14,21    | 3,18     |
| GAPDH      | 105,01 | 122,38   | 135,24   |
| HIF-1a (N) | 59,63  | 31,85    | 11,03    |
| PCNA       | 64,59  | 73,68    | 69,06    |

The lanes of the whole blot used for each figure are indicated

# Western blots

Figure 4, Panels A,B

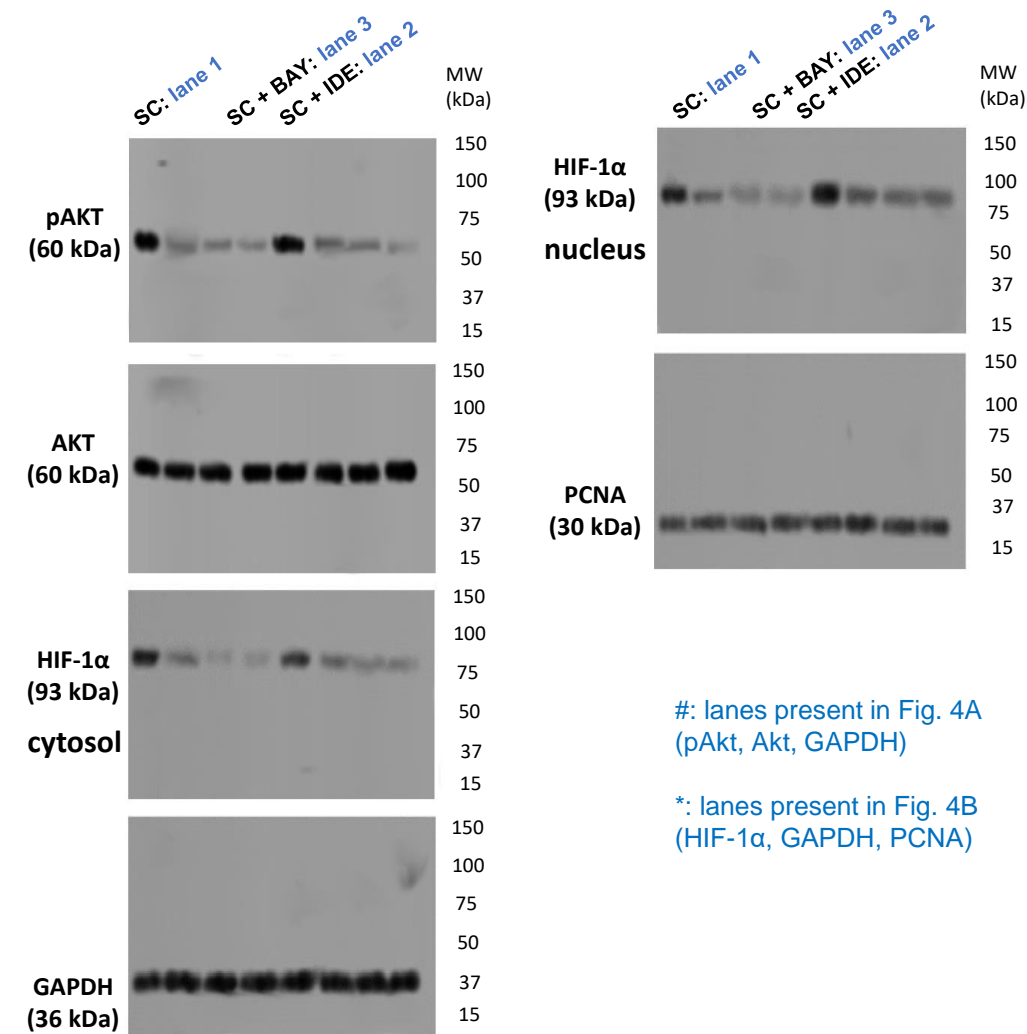

Densitometry reading

| UPN31      | SC     | SC + IDE | SC + BAY |
|------------|--------|----------|----------|
| pAKT       | 110,38 | 18,90    | /        |
| HIF-1a (C) | 87,78  | 10,07    | 9,41     |
| GAPDH      | 97,86  | 112,54   | 115,66   |
| HIF-1a (N) | 91,16  | 20,96    | 25,65    |
| PCNA       | 54,71  | 69,74    | 68,85    |

The lanes of the whole blot used for each figure are indicated

# Western blots

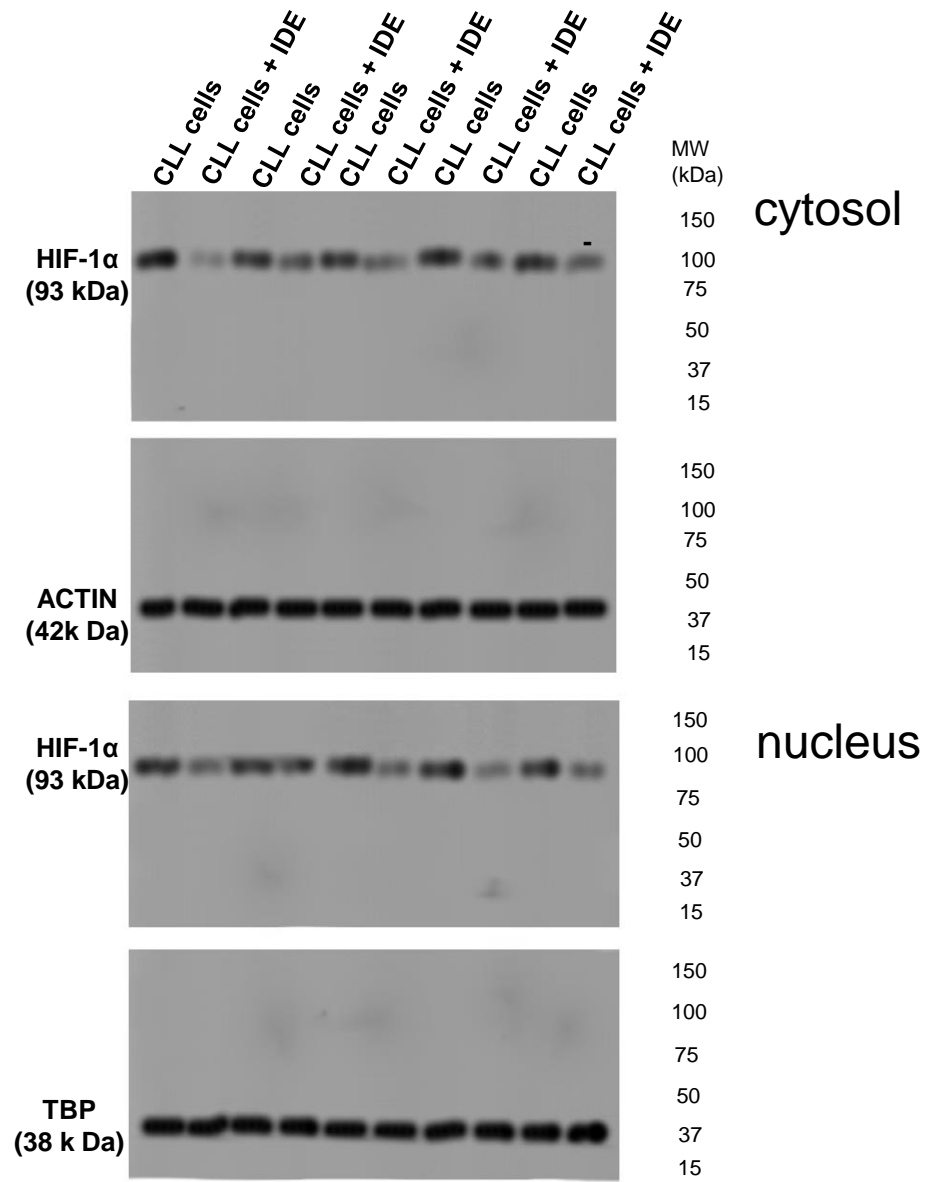

All lanes of the blot are included in the figure

Figure 6, Panel A

Densitometry reading

| UPN86      | -      | IDE    |
|------------|--------|--------|
| HIF-1a (C) | 82,62  | 18,36  |
| ACTIN      | 92,79  | 105,72 |
| HIF-1a (N) | 73,55  | 37,64  |
| TBP        | 107,18 | 106,82 |

| UPN76      | -      | IDE    |
|------------|--------|--------|
| HIF-1a (C) | 68,11  | 41,12  |
| ACTIN      | 106,05 | 106,70 |
| HIF-1a (N) | 81,74  | 37,20  |
| TBP        | 106,19 | 106,91 |

| UPN11      | -      | IDE    |
|------------|--------|--------|
| HIF-1a (C) | 73,70  | 43,24  |
| ACTIN      | 107    | 106,54 |
| HIF-1a (N) | 70,55  | 36,50  |
| TBP        | 105,47 | 116,48 |

Densitometry reading

| UPN06      | -      | IDE    |
|------------|--------|--------|
| HIF-1a (C) | 64,04  | 47,09  |
| ACTIN      | 106,01 | 106,58 |
| HIF-1a (N) | 68,64  | 58,98  |
| TBP        | 107,01 | 105,34 |

| UPN70      | -      | IDE    |
|------------|--------|--------|
| HIF-1a (C) | 79,27  | 48,31  |
| ACTIN      | 106,46 | 106,60 |
| HIF-1a (N) | 78,77  | 29,72  |
| TBP        | 105,92 | 106,01 |



Western blots

Figure S1

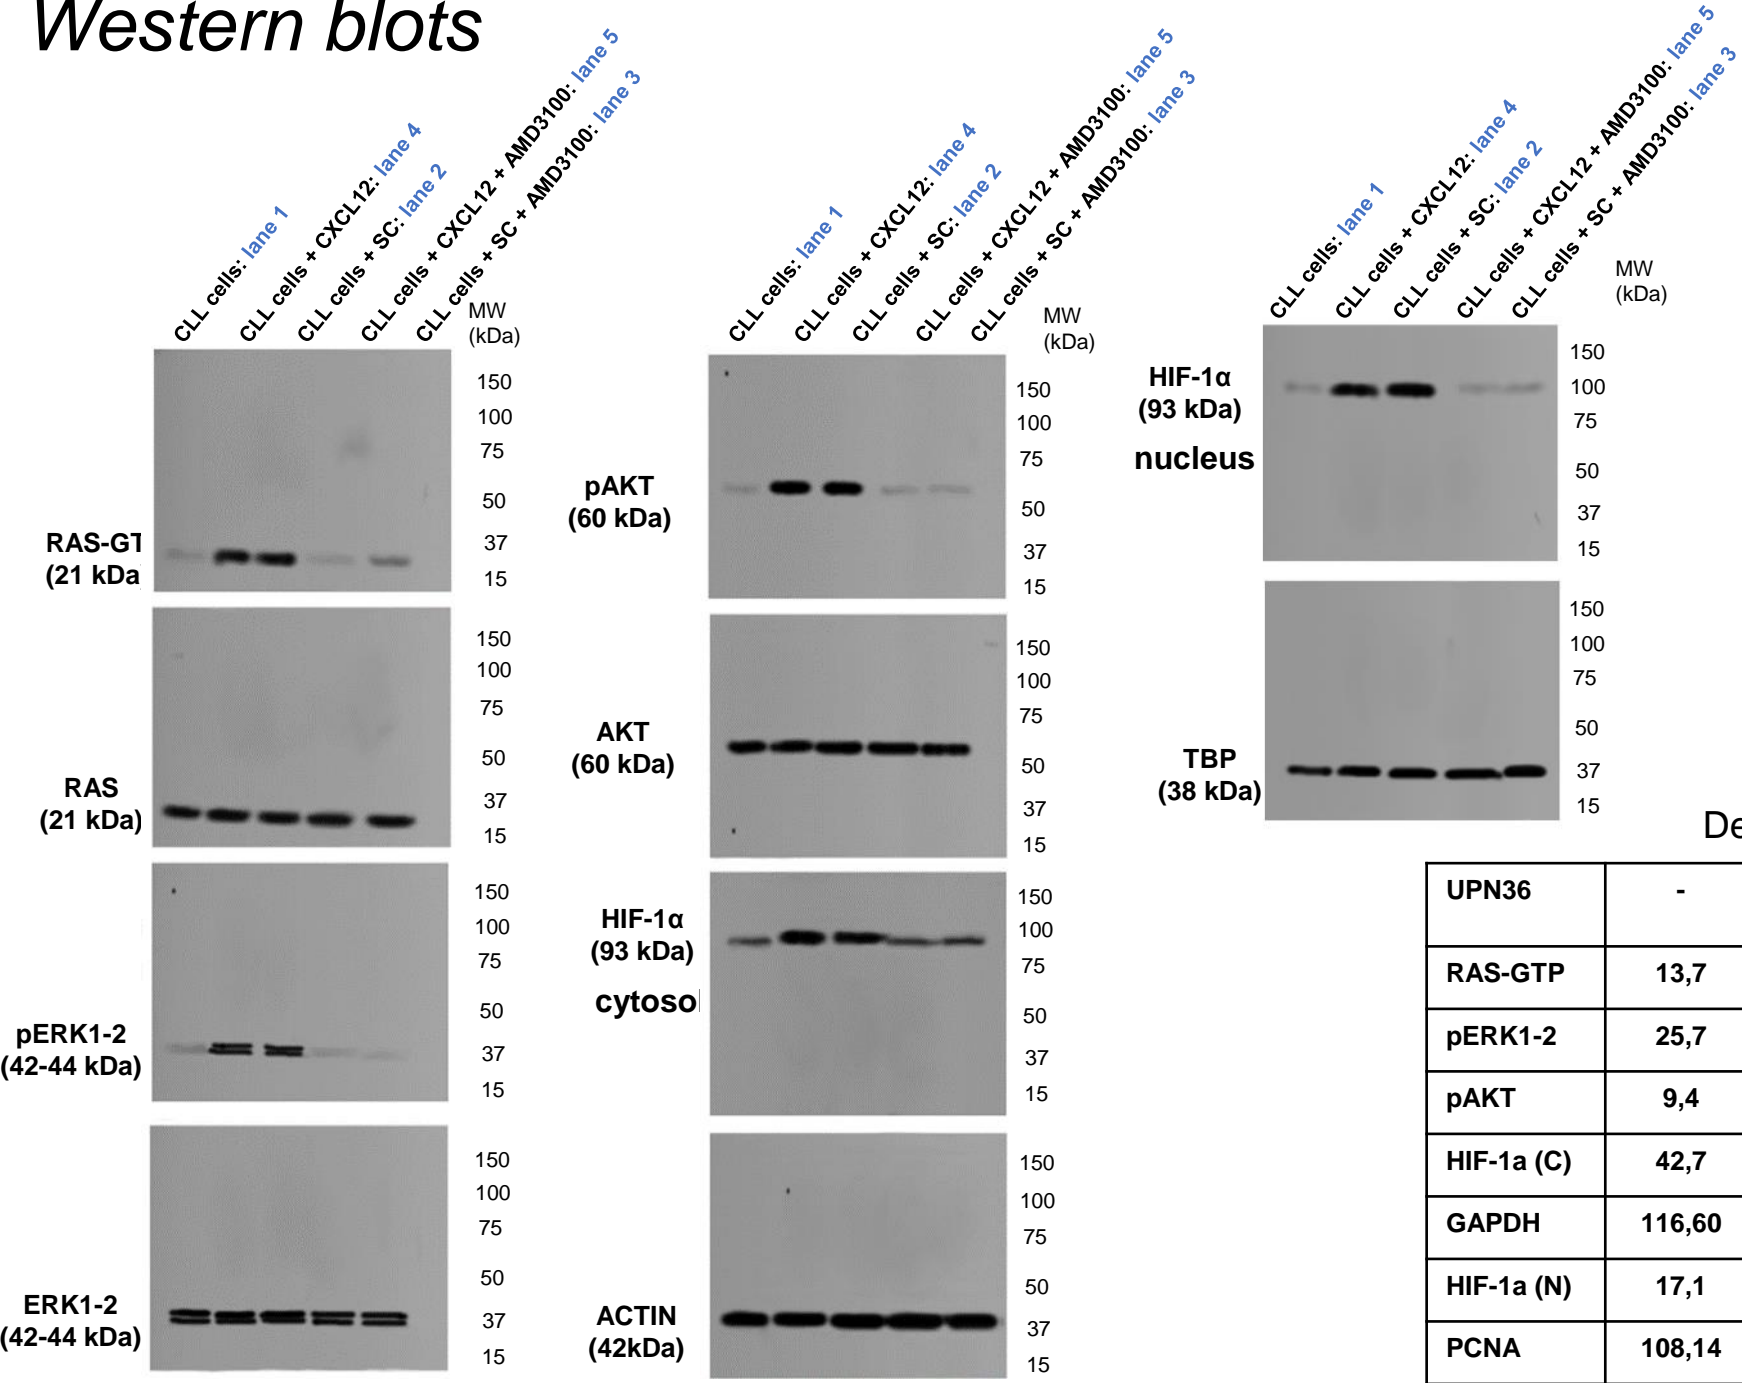

The lanes of the whole blot used for each figure are indicated

Densitometry reading

| UPN36      | -      | SC     | SC + AMD3100 | CXCL12 | CXCL12 + AMD3100 |
|------------|--------|--------|--------------|--------|------------------|
| RAS-GTP    | 13,7   | 82,5   | 17,2         | 77,5   | 2,9              |
| pERK1-2    | 25,7   | 84,4   | 7,4          | 91,9   | 13,8             |
| pAKT       | 9,4    | 101,2  | 1,9          | 104,7  | 2,9              |
| HIF-1a (C) | 42,7   | 96,5   | 50,2         | 112,4  | 47,7             |
| GAPDH      | 116,60 | 127,06 | 127,11       | 123,36 | 128,09           |
| HIF-1a (N) | 17,1   | 122,1  | 10,4         | 103,9  | 10,4             |
| PCNA       | 108,14 | 141,27 | 133,92       | 133,04 | 126,53           |

Western blots

Figure S3, Panels A,B

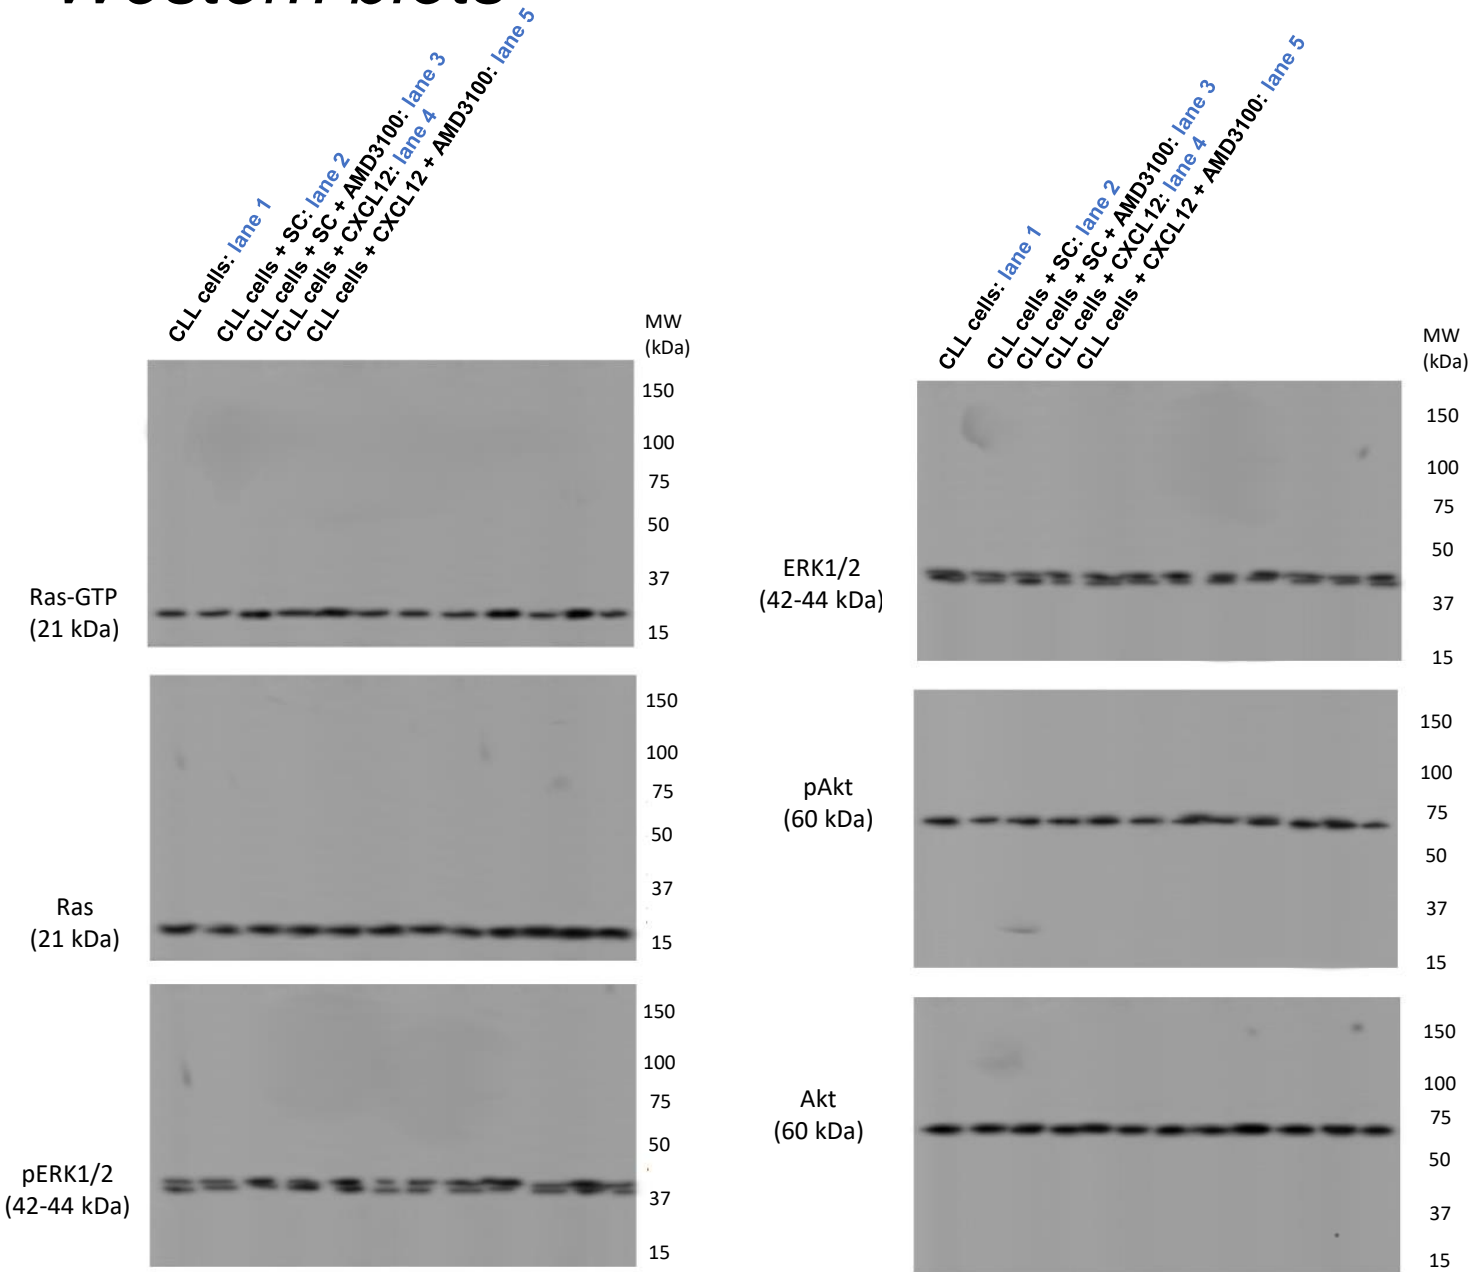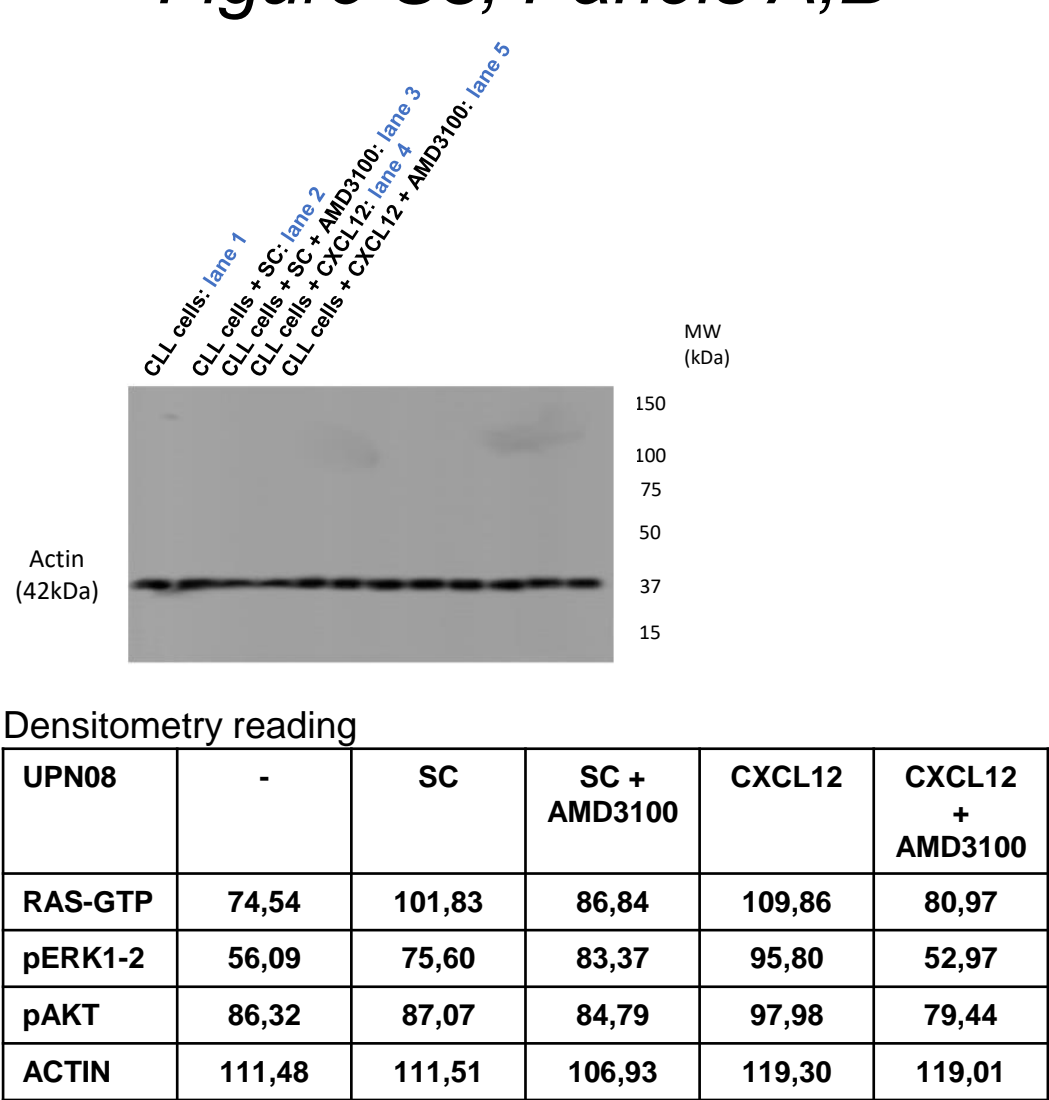

The lanes of the whole blot used for each figure are indicated

Western blots

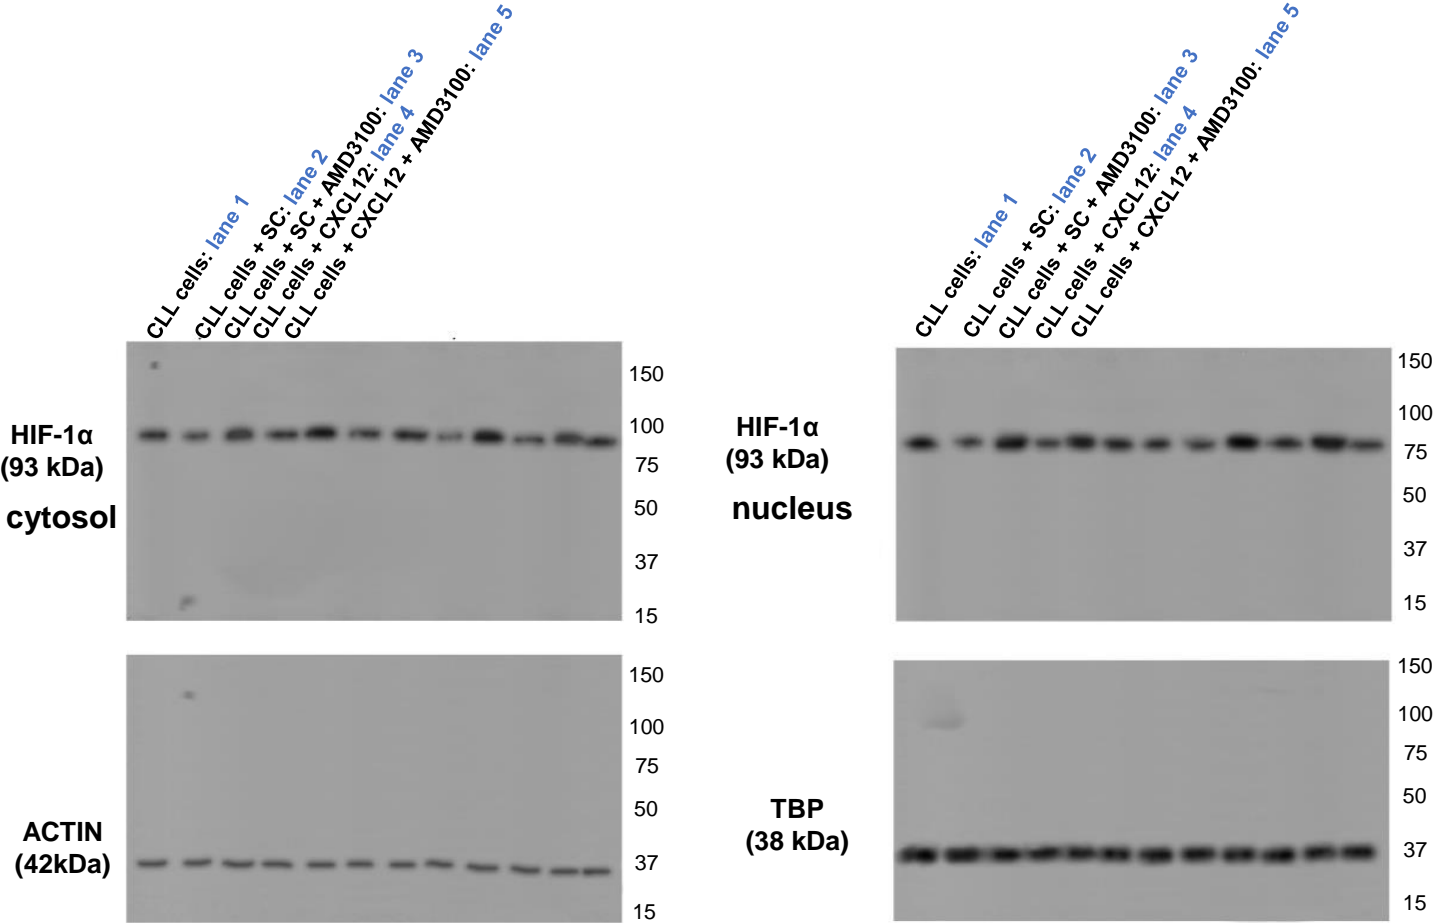

Figure S3, Panel D

Densitometry reading

| UPN08      | -      | SC     | SC + AMD3100 | CXCL12 | CXCL12 + AMD3100 |
|------------|--------|--------|--------------|--------|------------------|
| HIF-1a (C) | 63,96  | 71,01  | 65,21        | 92,30  | 59,38            |
| ACTIN      | 58,44  | 60,75  | 59,58        | 57,93  | 63,12            |
| HIF-1a (N) | 90,56  | 106,38 | 61,12        | 96,02  | 83,61            |
| TBP        | 103,35 | 112,17 | 104,32       | 101,43 | 104,78           |

The lanes of the whole blot used for each figure are indicated

Western blots

Figure 4A  
SC: lane 1  
SC + IDE 10 nM: lane 2  
SC + IDE 100 nM: lane 3  
SC + IDE 500 nM: lane 4  
SC + IDE 1 uM: lane 5  
SC + IDE 10 uM: lane 6  
Figure 4B  
SC + BAY 1 nM: lane 2  
SC + BAY 10 nM: lane 3  
SC + BAY 100 nM: lane 4  
SC + BAY 500 nM: lane 5  
SC + BAY 1 uM: lane 6

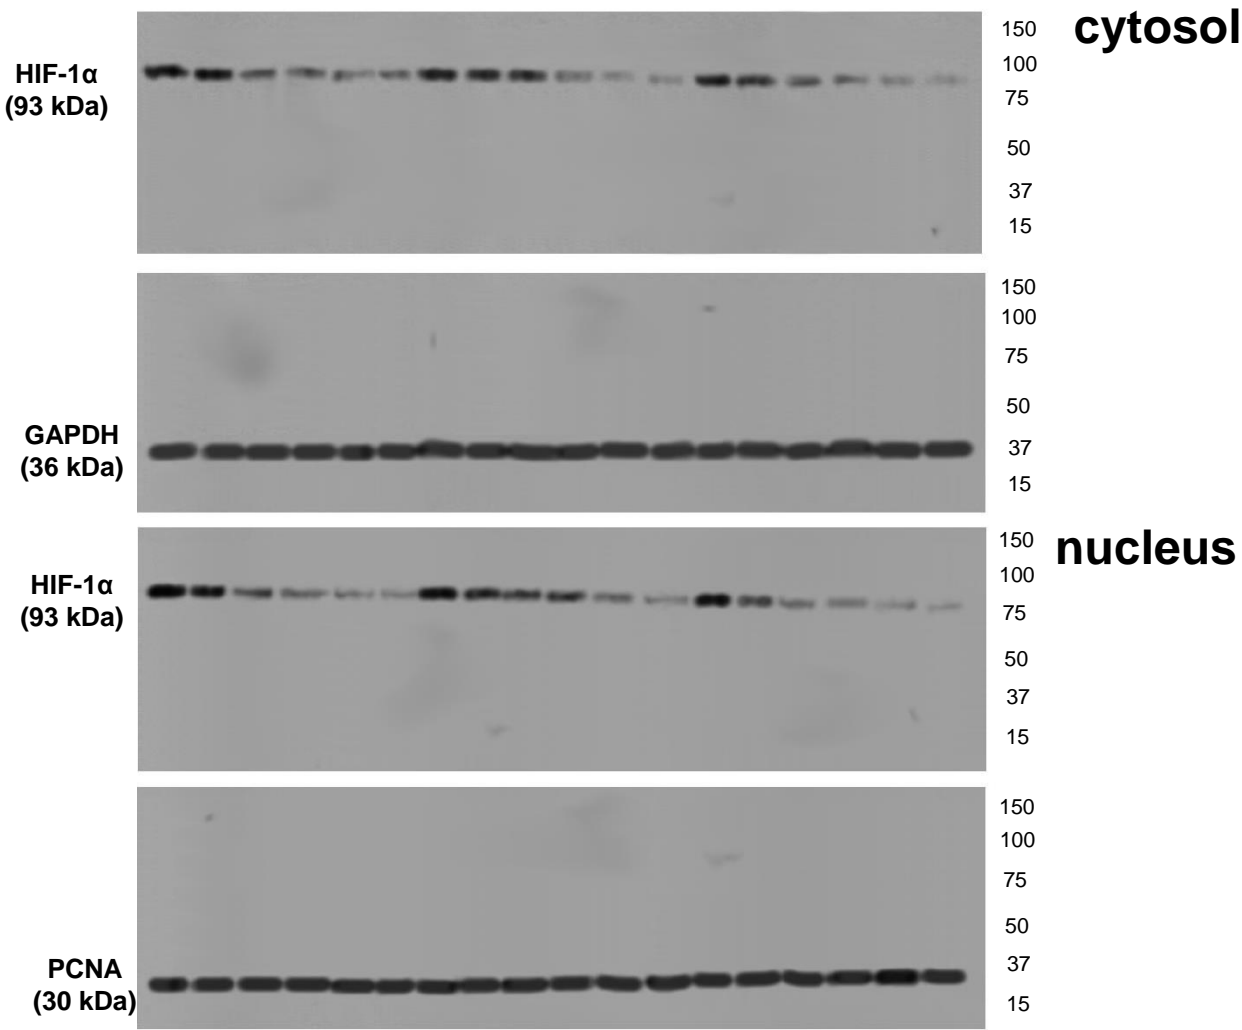

Figure S4

Densitometry reading

| M2-10B4    | SC     | SC + IDE 10 nM | SC + IDE 100 nM | SC + IDE 500 nM | SC + IDE 1 uM | SC + IDE 10 uM |
|------------|--------|----------------|-----------------|-----------------|---------------|----------------|
| HIF-1a (C) | 87,04  | 73,26          | 72,12           | 31,07           | 15,71         | 16,91          |
| GAPDH      | 91,37  | 92,03          | 89,72           | 92,77           | 87,97         | 89,53          |
| HIF-1a (N) | 106,85 | 81,09          | 66,13           | 68,69           | 37,45         | 20,96          |
| PCNA       | 106,7  | 103,69         | 108,24          | 102,92          | 102,72        | 107,62         |

| M2-10B4    | SC     | SC + BAY 1 nM | SC + BAY 10 nM | SC + BAY 100 nM | SC + BAY 500 nM | SC + BAY 1 uM |
|------------|--------|---------------|----------------|-----------------|-----------------|---------------|
| HIF-1a (C) | 80,11  | 70,24         | 44,08          | 30,06           | 18,90           | 13,42         |
| GAPDH      | 87,41  | 90,56         | 88,39          | 91,06           | 92,20           | 92,23         |
| HIF-1a (N) | 99,57  | 56,86         | 31,81          | 28,42           | 18,59           | 12,54         |
| PCNA       | 100,37 | 105,32        | 99,84          | 102,89          | 118,84          | 96,29         |
